# Supplementary material for: Effects of Environmental Enrichment on Exposure to Human-Relevant Mixtures of Endocrine Disrupting Chemicals in Zebrafish
Source: MDPI journal article supplement (doi:10.3390/ani14091296), 2024-04-25
Supplement: s1 [file s1]

## Supplementary materials

Supplementary materials for “*Effects of environmental enrichment on exposure to human-relevant mixtures of endocrine disrupting chemicals in zebrafish*”. Authors: Lina Birgersson, Sanne Odenlund and Joachim Sturve

**Supplementary Table S1.** Composition and concentration of EDC mixtures associated with low birth weight within the EDC-MixRisk project.

| Mixture component<br>(parent compound) | Name                                               | MIX G0   | MIX G1    |
|----------------------------------------|----------------------------------------------------|----------|-----------|
| MEP (DEP)                              | Mono-ethyl phthalate                               | 2.34E-08 | 3.204E-08 |
| MBP (DBP)                              | Mono-butyl phthalate                               | 2.00E-08 | 2.855E-08 |
| MBzP (BBzP)                            | Mono-benzyl phthalate                              | 9.1E-09  | 5.68E-09  |
| MINP (DINP)                            | Mono-isononyl phthalate                            | 1.79E-08 | -         |
| MEHP (DEHP)                            | Mono-ethyl hexyl phthalate                         | 1.24E-08 | 2.051E-08 |
| DPP                                    | Dipentyl phthalate                                 | -        | 4.9E-10   |
| TCS                                    | Triclosan                                          | 2.6E-09  | 3,00E-10  |
| PFOS                                   | Perfluorooctane sulfonate                          | 8.9E-09  | 1.048E-08 |
| PFOA                                   | Perfluorooctanoic acid                             | 2.9E-09  | 3.89E-09  |
| PFHxS                                  | Perfluorohexane sulfonate                          | 2.8E-09  | 3.28E-09  |
| 3-PBA                                  | 3-Phenoxybenzoic acid                              | -        | 1.1E-10   |
| p,p'DDE                                | p,p'-dichlorodiphenyldichloroethylene              | -        | 5.9E-10   |
| HCB                                    | Hexachlorobenzene                                  | -        | 1.6E-10   |
| MINCH (DINCH)                          | 1,2-Cyclohexane dicarboxylic acid diisononyl ester | -        | 5.2E-10   |
| 2-OH-PH                                | 2-hydroxyphenanthrene                              | -        | 1.36E-09  |

**Supplementary Table S2.** List of genes tested and primers used for RT-qPCR

| Gene                         | Forward primer (5'-3')        | Reverse primer (5'-3')      | Gene Accession |
|------------------------------|-------------------------------|-----------------------------|----------------|
| <i>dio1</i>                  | GTTCAAACAGCTTGTCAAGGACT       | AGCAAGCCTCTCCTCCAAGTT       | NM_001324404.1 |
| <i>dio2</i>                  | GCATAGGCAGTCGCTCATTT          | TGTGGTCTCTCATCCAACCA        | NM_212789.4    |
| <i>dio3</i>                  | GCGCGTACGGAGCTTACTTC          | AGCTCGGAGATGCGGAATCC        | NM_001256003.1 |
| <i>thra</i>                  | CTATGAACAGCACATCCGACAA<br>GAG | CACACCACACACGGCTCATC        | NM_131396.1    |
| <i>thrb</i>                  | TGGGAGATGATACGGGTTGT          | ATAGGTGCCGATCCAATGTC        | NM_131340.1    |
| <i>act<math>\beta</math></i> | GCAGAAGGAGATCACATCCCTG<br>GC  | CATTGCCGTCACCTTCACCGTT<br>C | NM_181601.4    |
| <i>gapdh</i>                 | TGACCTGATGGCACACATGG          | GATGGGAGAATGGTCGCGTA        | NM_001115114.1 |
| <i>rplp0</i>                 | CATCTCGCCCTTCTCCTACG          | AGGAATCTCTTGTGCAGGGC        | NM_131580.2    |
